# Supplementary material for: Photochemical asymmetric synthesis of phenyl-bearing quaternary chiral carbons using chiral-memory effect on β-hydrogen abstraction by thiocarbonyl group
Source: Royal Society of Chemistry journal article supplement (doi:10.1039/b608513j), 2006-01-01
Supplement: b608513j.pdf [file b608513j.pdf]

## Supplementary information

### Photochemical asymmetric synthesis of phenyl-bearing quaternary chiral carbons using chiral-memory effect on $\beta$ -hydrogen abstraction by thiocarbonyl group

Masami Sakamoto,\* Hiroya Kawanishi, Takashi Mino, Yoshio Kasashima,  
and Tsutomu Fujita

Department of Applied Chemistry and Biotechnology, Faculty of Engineering, Chiba University,  
Yayoi-cho, Inage-ku, Chiba 263-8522, Japan  
Fax: 81-43-290-3387; Tel: 81-43-290-3401; Fax.: 81+43-290-3387,  
e-mail: sakamotom@faculty.chiba-u.jp

#### X-Ray crystal data for (R)-1a, (S)-1e, (R)-2a, (R)-2b, and (R)-2d

Crystal data: for (R)-1a (recrystallized from a mixture of  $\text{CHCl}_3$  and hexane);  $\text{C}_{22}\text{H}_{19}\text{NOS}$ ,  $M_r = 345.44$ , orthorhombic, space group  $P2_12_12_1$ ,  $a = 6.126(3) \text{ \AA}$ ,  $b = 9.050(4) \text{ \AA}$ ,  $c = 32.991(11) \text{ \AA}$ ,  $V = 1829.0(13) \text{ \AA}^3$ ,  $Z = 4$ ,  $\rho = 1.255 \text{ Mgm}^{-3}$ ; in the final least-square refinement cycles on  $F^2$ , the model converged an  $R1 = 0.0440$ ,  $wR2 = 0.1187$  for 2052 reflections. Absolute structure parameter  $-0.02(4)$ . CCDC 611153.

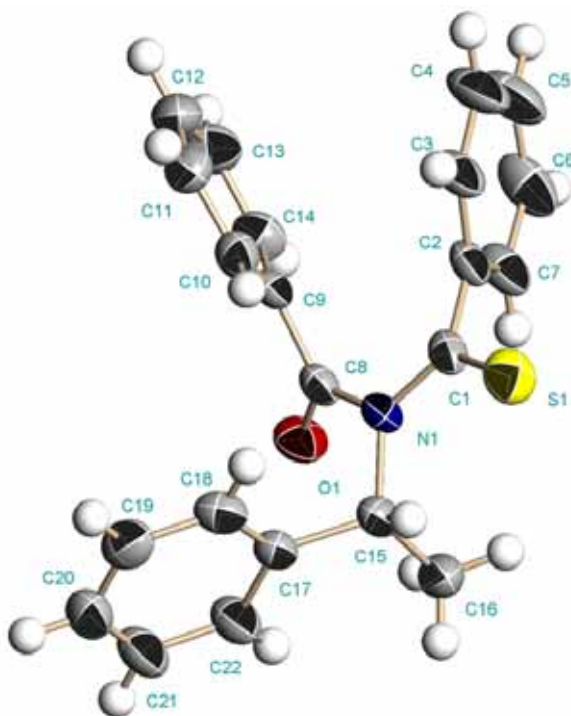

Fig. S1 View of 1a showing the atoms and thermal ellipsoids at 40% probability.

*Crystal data:* for (*S*)-**1e** (recrystallized from a mixture of CHCl<sub>3</sub> and hexane); C<sub>20</sub>H<sub>21</sub>NO<sub>3</sub>S, *Mr* = 355.44, monoclinic, space group *P*2<sub>1</sub>, *a* = 7.7525(8) Å, *b* = 12.0713(13) Å, *c* = 9.9335(10) Å,  $\beta$  = 97.9140(10)°, *V* = 920.70(17) Å<sup>3</sup>, *Z* = 2,  $\rho$  = 1.289 Mg m<sup>-3</sup>; in the final least-square refinement cycles on *F*<sup>2</sup>, the model converged an *R*<sub>1</sub> = 0.0286, *wR*<sub>2</sub> = 0.0759 for 3462 reflections. Absolute structure parameter 0.03(6). CCDC 611154.

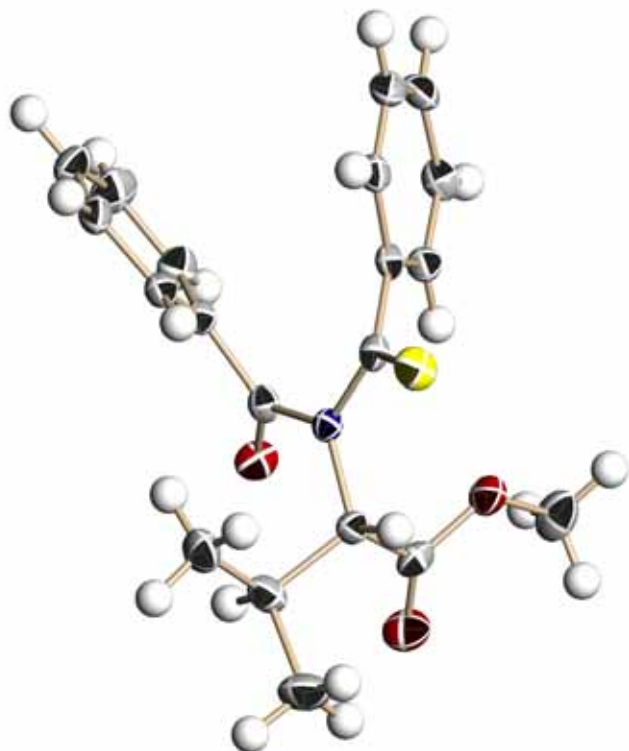

**Fig. S2** View of **1e** showing the atoms and thermal ellipsoids at 40% probability.

*Crystal data:* for (*R*)-**2a** (recrystallized from a mixture of CHCl<sub>3</sub> and hexane); C<sub>22</sub>H<sub>19</sub>NOS, *Mr* = 345.44, orthorhombic, space group *P*2<sub>1</sub>2<sub>1</sub>2<sub>1</sub>, *a* = 9.857(3) Å, *b* = 11.082(3) Å, *c* = 17.126(5) Å, *V* = 1870.8(9) Å<sup>3</sup>, *Z* = 4,  $\rho$  = 1.266 Mg m<sup>-3</sup>; in the final least-square refinement cycles on *F*<sup>2</sup>, the model converged an *R*<sub>1</sub> = 0.0612, *wR*<sub>2</sub> = 0.1447 for 3956 reflections. Absolute structure parameter 0.08(3). CCDC 611155.

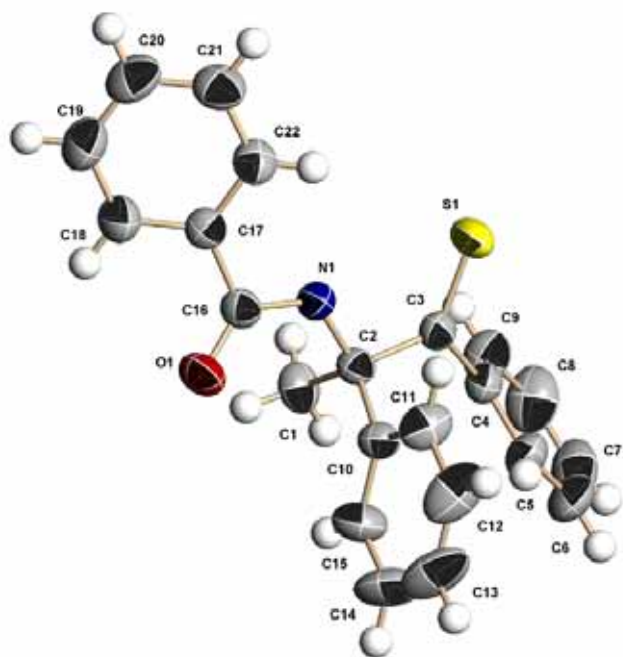

**Fig. S3** View of **2a** showing the atoms and thermal ellipsoids at 40% probability..

*Crystal data:* for (**R**)-**2b** (recrystallized from a mixture of  $\text{CHCl}_3$  and hexane),  $\text{C}_{23}\text{H}_{21}\text{NOS}$ ,  $M_r = 359.47$ , orthorhombic, space group  $P2_12_12_1$ ,  $a = 9.7025(7) \text{ \AA}$ ,  $b = 9.9727(7) \text{ \AA}$ ,  $c = 20.1303(15) \text{ \AA}$ ,  $V = 1947.8(2) \text{ \AA}^3$ ,  $Z = 4$ ,  $\rho = 1.229 \text{ Mg m}^{-3}$ ; in the final least-square refinement cycles on  $F^2$ , the model converged an  $R_1 = 0.0372$ ,  $wR_2 = 0.0534$  for 4445 reflections. Absolute structure parameter 0.03(5). CCDC 611156.

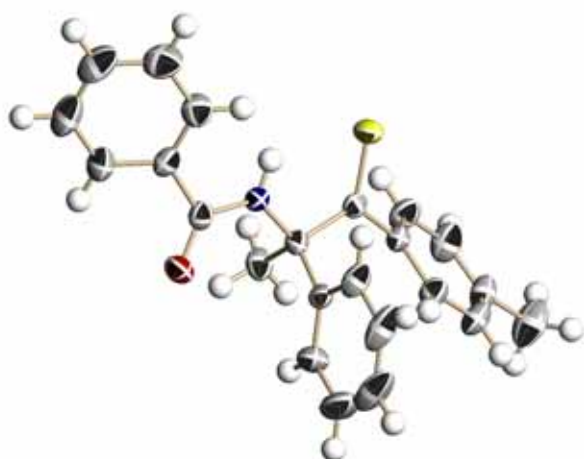

**Fig. S4** View of **2b** showing the atoms and thermal ellipsoids at 40% probability.

*Crystal data:* for (**R**)-**2d** (recrystallized from a mixture of CHCl<sub>3</sub> and hexane) C<sub>22</sub>H<sub>18</sub>ClNOS, *Mr* = 379.88, orthorhombic, space group *P*2<sub>1</sub>2<sub>1</sub>2<sub>1</sub>, *a* = 9.6375(5) Å, *b* = 10.0167(5) Å, *c* = 20.0523(10) Å, *V* = 1935.77(17) Å<sup>3</sup>, *Z* = 4,  $\rho$  = 1.314 Mg m<sup>-3</sup>; in the final least-square refinement cycles on *F*<sup>2</sup>, the model converged an *R*<sub>1</sub> = 0.0346, *wR*<sub>2</sub> = 0.0746 for 4458 reflections. Absolute structure parameter -0.05(5). CCDC 611157.

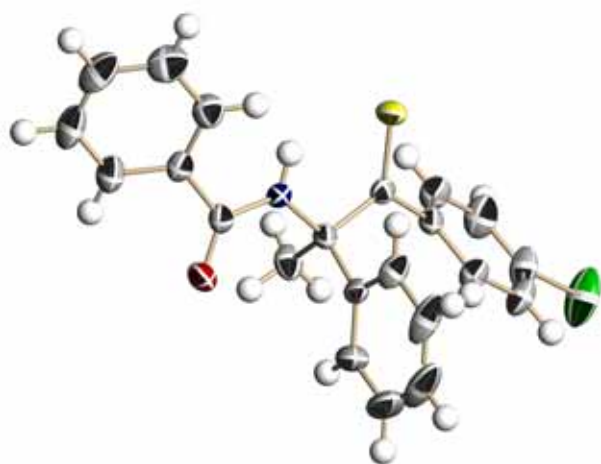

**Fig. S5** View of **2d** showing the atoms and thermal ellipsoids at 40% probability.
